# Supplementary material for: Fungus Metarhizium robertsii and neurotoxic insecticide affect gut immunity and microbiota in Colorado potato beetles
Source: PubMed Central journal article supplement (PMC7809261; doi:10.1038/s41598-020-80565-x), 2021-01-14
Supplement: 41598_2020_80565_MOESM2_ESM.pdf [file 41598_2020_80565_MOESM2_ESM.pdf]

## APPENDIX B

### **Fungus *Metarhizium robertsii* and neurotoxic insecticide affect the gut immunity and microbiota in Colorado potato beetle**

Vadim Yu. Kryukov, Ulyana Rotskaya, Olga Yaroslavtseva, Olga Polenogova, Natalia Kryukova, Yuriy Akhanaev, Anton Krivopalov, Tatyana Alikina, Yana Vorontsova, Irina Slepneva, Marsel Kabilov, Viktor V. Glupov

Table S1. Putative identification of 16S rRNA gene sequences of isolates of bacteria of the genus *Serratia* from the gut of the Colorado potato beetle using the BLAST algorithm compared to similar sequences obtained from GenBank

| Isolated numbers | GenBank accession numbers | Nearest match                 | GenBank accession numbers | Identity (%) |
|------------------|---------------------------|-------------------------------|---------------------------|--------------|
| 0218             | MT256306                  | <i>Serratia nematodiphila</i> | NR_044385.1               | 100          |
| 3318             | MT256278                  | <i>Serratia quinivorans</i>   | NR_037112.1               | 99.77        |
| 10918            | MT256307                  | <i>Serratia marcescens</i>    | NR_114043.1               | 99.86        |
| 5618             | MT256279                  | <i>Serratia quinivorans</i>   | NR_037112.1               | 99.78        |

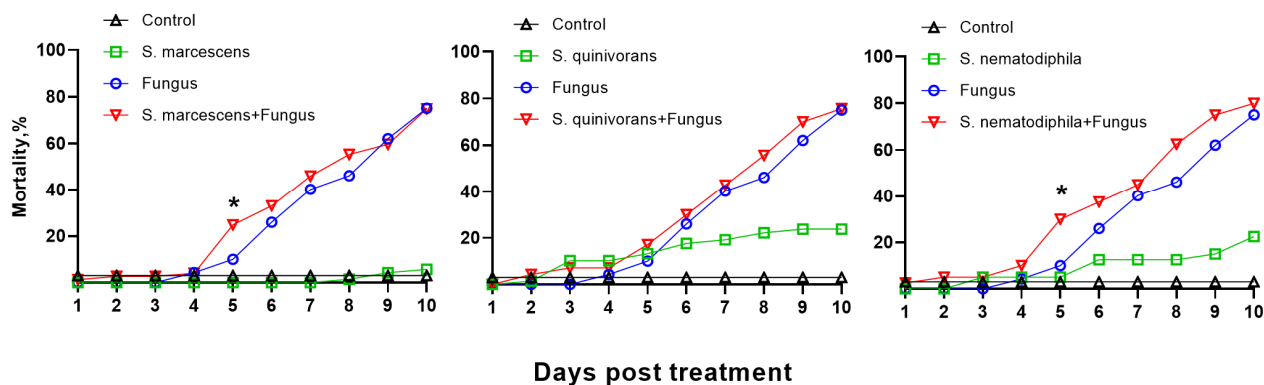

Fig. S1. Mortality dynamics of Colorado potato beetle larvae after topical treatment with *M. robertsii*, oral administration of *Serratia* species and the combined treatment; \* - synergistic effect ( $\chi^2 > 3.8$ ,  $df = 1$ ,  $P < 0.05$ ).

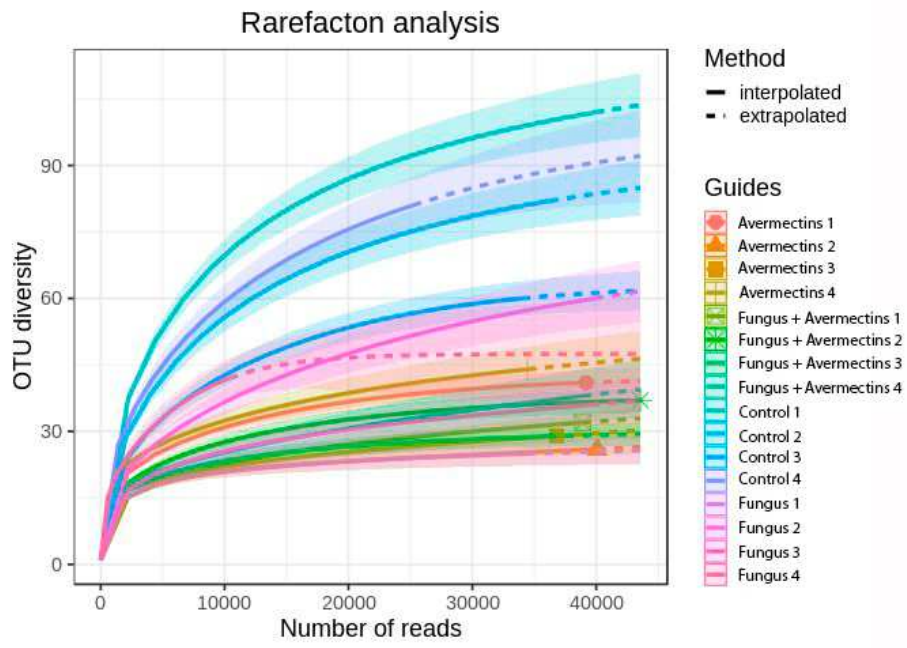

Fig. S2. Rarefaction curves of the OTU number for each sample.

Table S2. List and description of genes and primers sequences used in the qPCR.

| Gene Name                                                | NCBI GenBank Accession number | Gene symbol             | Primer sequence (5' – 3')                                    | Product size (bp) | PCR efficiency ( $\pm$ SD) | Tm in qPCR, °C | Primers source        |
|----------------------------------------------------------|-------------------------------|-------------------------|--------------------------------------------------------------|-------------------|----------------------------|----------------|-----------------------|
| 60S ribosomal protein L4                                 | XM_023165859.1                | <i>Rp4</i>              | For GAAACGAGCATTGCCCTTCC<br>Rev TCGCTGACACTGTAGGGTTG         | 119               | 1,99 $\pm$ 0,03            | 62             | <sup>a</sup> modified |
| ADF-ribosylation factor-like protein 1                   | XM_023169879.1                | <i>ARF1</i>             | For CGGTGCTGGTAAAACGACAATATT<br>Rev TGACCTCCCAAATCCCAAACCTT  | 135               | 0,97 $\pm$ 0,04            | 62             | <sup>a</sup> modified |
| DorsalDif-like protein                                   | XM_023158121.1                | <i>Dorsal-like</i>      | For TGTGCGAAAAGGTGGCTAAAG<br>Rev ACTTGGGAGGGTTGGAAGTC        | 94                | 1,93 $\pm$ 0,07            | 62             | <sup>b</sup> ISaEA    |
| NF-kappaB-like protein                                   | XM_023174540.1                | <i>NF-kB-like</i>       | For AAGCAGCGGTTTGATTTCGTTT<br>Rev AACTCGTCCAAGTTCTCCAGG      | 120               | 1,97 $\pm$ 0,03            | 62             | <sup>b</sup> ISaEA    |
| Signal transducer and activator of transcription protein | XM_023165198.1                | <i>Stat</i>             | For AGGAGCAGAACACAGGGTAC<br>Rev TTTGCCTGGGAATTCTGTTGAC       | 140               | 1,93 $\pm$ 0,08            | 62             | <sup>b</sup> ISaEA    |
| Attacin_C domain contained protein                       | XM_023168834.1                | <i>Att34</i>            | For TGAGAACTCCACAAAATATTCCTTCG<br>Rev CTAAGGGTATGGCAGCAACAAC | 98                | 1,95 $\pm$ 0,04            | 62             | <sup>b</sup> ISaEA    |
| Heat shock protein 90                                    | KC556802.1                    | <i>Hsp90</i>            | For GGGTGTAGTCGACTCTGAAGAC<br>Rev AGAGCTCCTCAAACAGTTCCAA     | 125               | 1,89 $\pm$ 0,01            | 62             | <sup>b</sup> ISaEA    |
| Gut membrane-associated protein Mesh                     | XM_023158552.1                | <i>Mesh<sup>a</sup></i> | For CGCAATGGTTCAACGATATGGT<br>Rev GCTTGGTACGCGACACAGT        | 124               | 1,98 $\pm$ 0,01            | 62             | <sup>b</sup> ISaEA    |

<sup>a</sup> Shi X.-Q. et al., Validation of reference genes for expression analysis by quantitative real-time PCR in *Leptinotarsa decemlineata*(Say) Shiet al. BMC Research Notes 2013, doi: 10.1186/1756-0500-6-93

<sup>b</sup> Primers were designed by Rotskaya U. in programs Primer-BLAST <https://www.ncbi.nlm.nih.gov/tools/primer-blast/>, IDT OligoAnalyser Tool and IDT UNAFold Tool <https://eu.idtdna.com> .
